# Supplementary material for: The Csr system regulates genome-wide mRNA stability and transcription and thus gene expression in Escherichia coli
Source: PubMed Central journal article supplement (PMC4844966; doi:10.1038/srep25057), 2016-04-26
Supplement: srep25057-s1.pdf [file srep25057-s1.pdf]

## Supplementary Information

### **The Csr system regulates genome-wide mRNA stability and transcription and thus gene expression in *Escherichia coli***

Thomas Esquerré<sup>1,2,3,4</sup>, Marie Bouvier<sup>4</sup>, Catherine Turlan<sup>4</sup>, Agamemnon J. Carpousis<sup>4</sup>,  
Laurence Girbal<sup>1,2,3,\*,+</sup>, and Muriel Cocaign-Bousquet<sup>1,2,3,+</sup>

<sup>1</sup> Université de Toulouse; INSA, UPS, INP; LISBP, 135, avenue de Rangueil, 31077  
Toulouse, France

<sup>2</sup> INRA, UMR792 Ingénierie des systèmes biologiques et des procédés, 31400 Toulouse,  
France

<sup>3</sup> CNRS, UMR5504, 31400 Toulouse, France

<sup>4</sup> Laboratoire de Microbiologie et Génétique Moléculaires, UMR5100, Centre National de la  
Recherche Scientifique et Université Paul Sabatier, 118 Route de Narbonne, 31062,  
Toulouse, France.

\* corresponding author: [girbal@insa-toulouse.fr](mailto:girbal@insa-toulouse.fr)

+ These authors contributed equally to this work

**Figure S1.** Phenotypic characterization of the MG1655(*csrA51*) mutant strain. (A) Glycogen staining assay in the MG1655, MG1655(*csrA51*) and *csrA+* strains. (B) Motility and biofilm formation assays in the MG1655 and MG1655(*csrA51*) strains. (C) Level of CsrB and CsrC in the MG1655 and MG1655(*csrA51*) strains in Northern blots of total RNA probed for CsrB and CsrC.

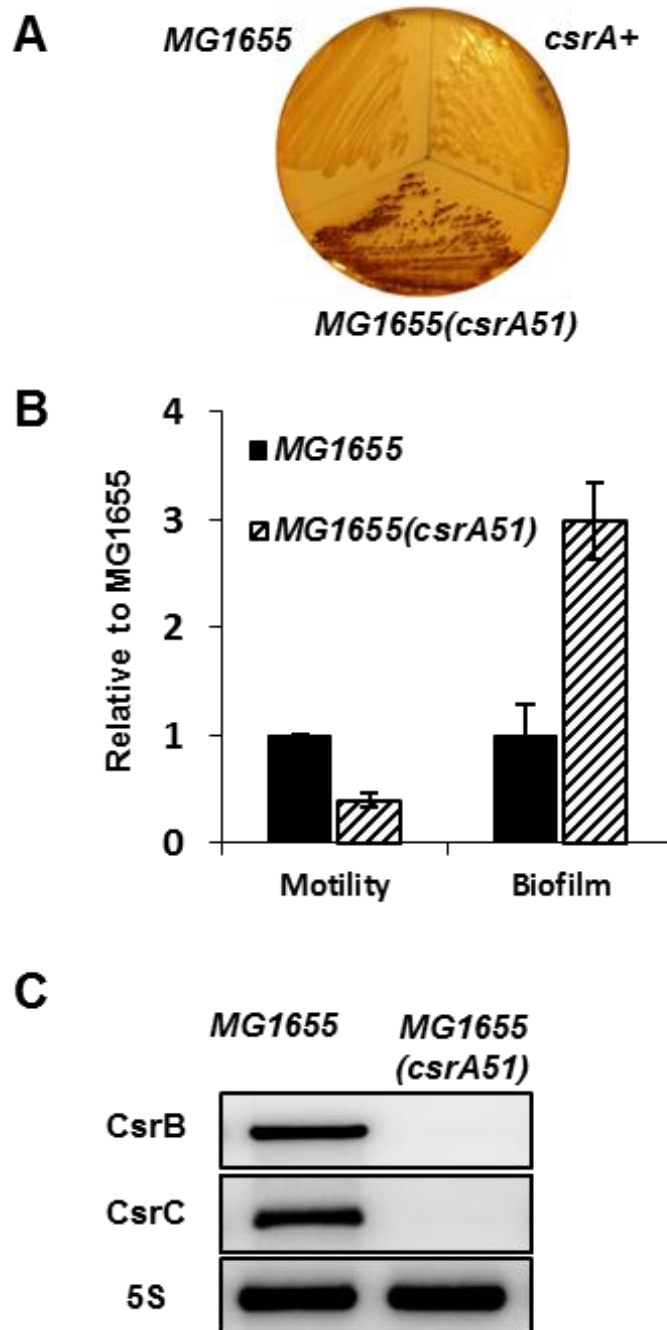

**Figure S2.** Effect of the  $\Delta csrD$  mutation on the stability of CsrB and CsrC sRNAs. CsrB and CsrC stability in MG1655 and MG1655( $\Delta csrD$ ) strains was measured in Northern blot and quantified by PhosphorImager. All experiments were repeated at least twice.

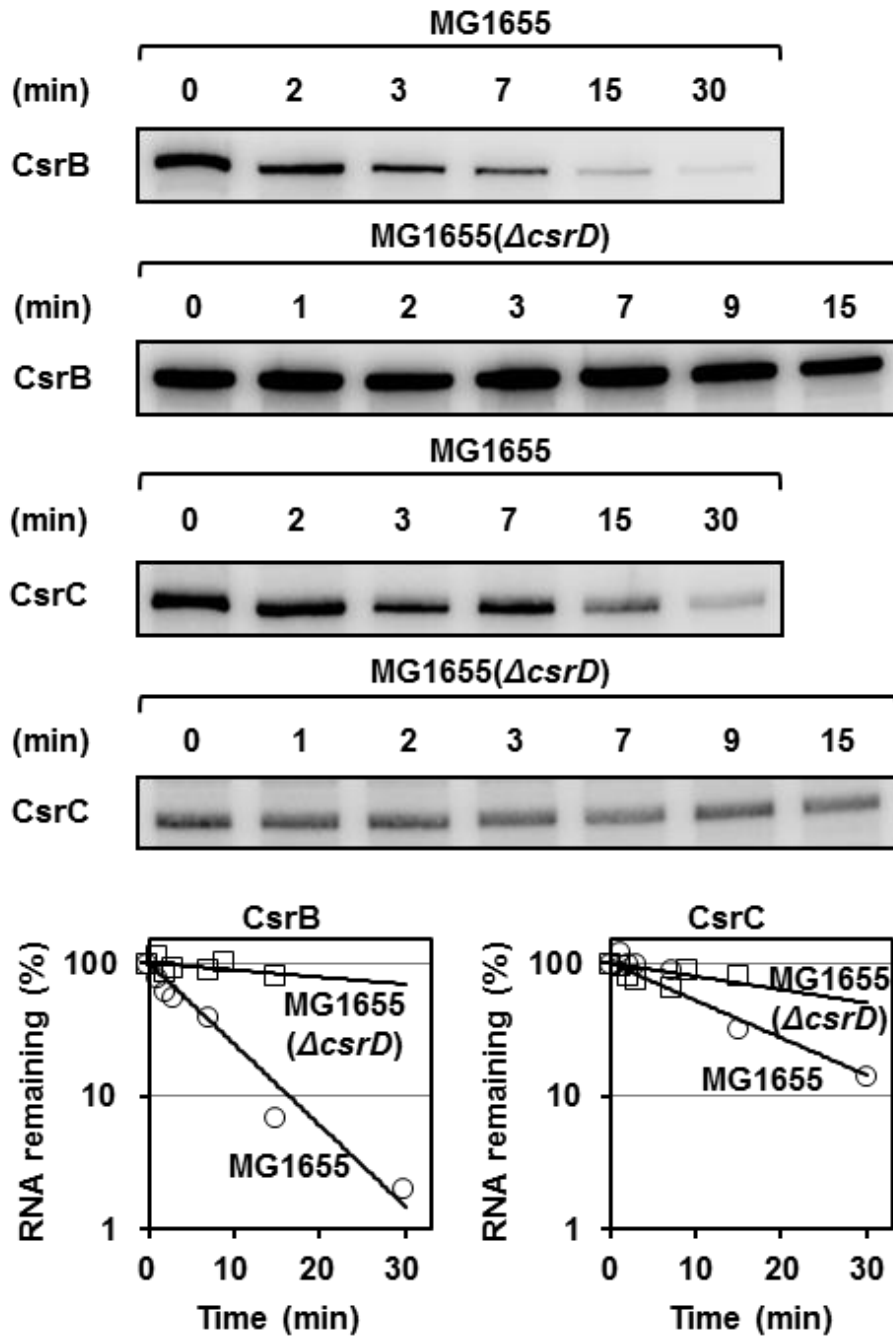

**Table S4:** Comparison of  $\beta$ -galactosidase activity of transcriptional fusions in the strains MG1655, MG1655(*csrA51*) and MG1655( $\Delta$ *csrD*). Ratios of  $\beta$ -galactosidase activity between two strains are given.

|                    | MG1655( <i>csrA51</i> )<br>/ MG1655 |                            | MG1655( $\Delta$ <i>csrD</i> )<br>/ MG1655 |
|--------------------|-------------------------------------|----------------------------|--------------------------------------------|
| glgB:: <i>lacZ</i> | 1.55 $\pm$ 0.13                     | <i>csrC</i> :: <i>lacZ</i> | 0.48 $\pm$ 0.00                            |
| ydeH:: <i>lacZ</i> | 1.34 $\pm$ 0.32                     | <i>fdrA</i> :: <i>lacZ</i> | 0.44 $\pm$ 0.03                            |

**Table S7.** List of the 99 mRNAs for which direct regulation of stability by CsrA had an impact on quantity.

**CsrA regulation:** (-) negative and (+) positive in the MG1655 cells

**Degradational coefficient  $\rho_D$  value:** if  $\rho_D \geq 0,6$  (bold), mRNA amount is mainly controlled by degradation; if  $\rho_D \leq 0,6$  (italic) mRNA amount is equally controlled by degradation and transcription or mainly controlled by transcription

| Blattner | Gene Symbol | CsrA regulation | Fold change of half-lives MG1655( <i>csrA51</i> ) / MG1655 | Fold change of mRNA amounts MG1655( <i>csrA51</i> ) / MG1655 | Degradational coefficient $\rho_D$ value |
|----------|-------------|-----------------|------------------------------------------------------------|--------------------------------------------------------------|------------------------------------------|
| b0072    | <i>leuC</i> | -               | 1.50                                                       | 1.28                                                         | <b>1.67</b>                              |
| b0073    | <i>leuB</i> | -               | 1.53                                                       | 1.34                                                         | <b>1.45</b>                              |
| b0118    | <i>acnB</i> | -               | 2.15                                                       | 1.12                                                         | <b>6.83</b>                              |
| b0212    | <i>gloB</i> | +               | 0.69                                                       | 0.65                                                         | <b>0.88</b>                              |
| b0391    | <i>yaiE</i> | +               | 0.68                                                       | 0.62                                                         | <b>0.82</b>                              |
| b0406    | <i>tgt</i>  | +               | 0.54                                                       | 0.82                                                         | <b>3.01</b>                              |
| b0476    | <i>aes</i>  | +               | 0.72                                                       | 0.71                                                         | <b>0.99</b>                              |
| b0688    | <i>pgm</i>  | -               | 1.41                                                       | 3.19                                                         | <i>0.29</i>                              |
| b0721    | <i>sdhC</i> | -               | 1.17                                                       | 1.13                                                         | <b>1.28</b>                              |
| b0897    | <i>ycaC</i> | +               | 0.29                                                       | 0.61                                                         | <b>2.54</b>                              |
| b1042    | <i>csgA</i> | +               | 0.46                                                       | 0.77                                                         | <b>3.04</b>                              |
| b1089    | <i>rpmF</i> | +               | 0.63                                                       | 0.79                                                         | <b>1.97</b>                              |
| b1092    | <i>fabD</i> | -               | 1.40                                                       | 1.85                                                         | <i>0.55</i>                              |
| b1095    | <i>fabF</i> | -               | 1.61                                                       | 1.28                                                         | <b>1.94</b>                              |
| b1178    | <i>pliG</i> | +               | 0.56                                                       | 0.65                                                         | <b>1.33</b>                              |
| b1219    | <i>yehN</i> | +               | 0.72                                                       | 0.58                                                         | <b>0.60</b>                              |
| b1324    | <i>tpx</i>  | +               | 0.54                                                       | 0.77                                                         | <b>2.31</b>                              |
| b1380    | <i>ldhA</i> | +               | 0.60                                                       | 0.82                                                         | <b>2.62</b>                              |
| b1415    | <i>aldA</i> | +               | 0.65                                                       | 0.93                                                         | <b>5.58</b>                              |
| b1440    | <i>ydcS</i> | +               | 0.78                                                       | 0.50                                                         | <i>0.35</i>                              |
| b1461    | <i>pptA</i> | +               | 0.53                                                       | 0.61                                                         | <b>1.27</b>                              |
| b1479    | <i>maeA</i> | -               | 1.41                                                       | 1.32                                                         | <b>1.25</b>                              |
| b1538    | <i>dcp</i>  | +               | 0.79                                                       | 0.78                                                         | <b>0.92</b>                              |
| b1602    | <i>pntB</i> | -               | 1.55                                                       | 1.32                                                         | <b>1.56</b>                              |
| b1603    | <i>pntA</i> | -               | 1.54                                                       | 1.21                                                         | <b>2.25</b>                              |
| b1612    | <i>fumA</i> | -               | 1.32                                                       | 1.12                                                         | <b>2.48</b>                              |
| b1619    | <i>hdhA</i> | +               | 0.64                                                       | 0.77                                                         | <b>1.70</b>                              |
| b1667    | <i>ydhR</i> | +               | 0.53                                                       | 0.19                                                         | <i>0.38</i>                              |
| b1692    | <i>ydiB</i> | +               | 0.57                                                       | 0.64                                                         | <b>1.23</b>                              |
| b1694    | <i>ydiF</i> | +               | 0.60                                                       | 0.76                                                         | <b>1.84</b>                              |
| b1695    | <i>ydiO</i> | +               | 0.65                                                       | 0.73                                                         | <b>1.35</b>                              |
| b1718    | <i>infC</i> | -               | 1.37                                                       | 1.29                                                         | <b>1.23</b>                              |

|       |             |   |      |      |             |
|-------|-------------|---|------|------|-------------|
| b1719 | <i>thrS</i> | - | 1.64 | 1.59 | <b>1.06</b> |
| b1779 | <i>gapA</i> | - | 1.66 | 1.39 | <b>1.54</b> |
| b1782 | <i>mipA</i> | - | 1.41 | 1.36 | <b>1.12</b> |
| b1800 | <i>dmlA</i> | + | 0.69 | 0.67 | <b>0.92</b> |
| b1817 | <i>manX</i> | - | 2.02 | 1.71 | <b>1.32</b> |
| b1818 | <i>manY</i> | - | 2.29 | 1.25 | <b>3.74</b> |
| b1819 | <i>manZ</i> | - | 2.10 | 1.37 | <b>2.37</b> |
| b1823 | <i>cspC</i> | + | 0.64 | 0.28 | <i>0.35</i> |
| b1824 | <i>yobF</i> | + | 0.45 | 0.37 | <b>0.79</b> |
| b1852 | <i>zwf</i>  | + | 0.79 | 0.93 | <b>3.19</b> |
| b1901 | <i>araF</i> | + | 0.54 | 0.51 | <b>0.90</b> |
| b2001 | <i>yeeR</i> | + | 0.60 | 0.06 | <i>0.18</i> |
| b2094 | <i>gatA</i> | - | 1.62 | 1.19 | <b>2.79</b> |
| b2095 | <i>gatZ</i> | - | 1.84 | 1.22 | <b>3.06</b> |
| b2245 | <i>yfaU</i> | + | 0.57 | 0.82 | <b>2.96</b> |
| b2246 | <i>rhmT</i> | + | 0.48 | 0.69 | <b>2.02</b> |
| b2360 | <i>yfdQ</i> | + | 0.68 | 0.49 | <i>0.55</i> |
| b2463 | <i>maeB</i> | - | 2.26 | 1.40 | <b>2.43</b> |
| b2521 | <i>sseA</i> | - | 1.32 | 3.10 | <i>0.24</i> |
| b2542 | <i>hcaD</i> | + | 0.73 | 0.84 | <b>1.84</b> |
| b2702 | <i>srlA</i> | + | 0.31 | 0.53 | <b>1.83</b> |
| b2703 | <i>srlE</i> | + | 0.28 | 0.42 | <b>1.47</b> |
| b2704 | <i>srlB</i> | + | 0.32 | 0.39 | <b>1.21</b> |
| b2799 | <i>fucO</i> | - | 2.96 | 4.07 | <b>0.77</b> |
| b2937 | <i>speB</i> | + | 0.53 | 0.73 | <b>2.02</b> |
| b2938 | <i>speA</i> | - | 1.49 | 1.19 | <b>2.27</b> |
| b2989 | <i>yghU</i> | + | 0.59 | 0.65 | <b>1.23</b> |
| b3008 | <i>metC</i> | + | 0.64 | 0.73 | <b>1.41</b> |
| b3011 | <i>yqhD</i> | + | 0.50 | 0.72 | <b>2.12</b> |
| b3067 | <i>rpoD</i> | - | 2.79 | 1.26 | <b>4.37</b> |
| b3077 | <i>ebgC</i> | + | 0.57 | 0.66 | <b>1.34</b> |
| b3078 | <i>ygjI</i> | + | 0.52 | 0.68 | <b>1.69</b> |
| b3089 | <i>sstT</i> | - | 1.35 | 2.32 | <i>0.36</i> |
| b3091 | <i>uxaA</i> | + | 0.66 | 0.80 | <b>1.86</b> |
| b3092 | <i>uxaC</i> | + | 0.52 | 0.80 | <b>2.93</b> |
| b3133 | <i>agaV</i> | + | 0.67 | 0.70 | <b>1.10</b> |
| b3134 | <i>agaW</i> | + | 0.73 | 0.75 | <b>1.12</b> |
| b3253 | <i>yhdH</i> | + | 0.69 | 0.65 | <b>0.87</b> |
| b3310 | <i>rplN</i> | - | 1.29 | 1.13 | <b>2.06</b> |
| b3313 | <i>rplP</i> | - | 2.10 | 1.17 | <b>4.63</b> |
| b3316 | <i>rpsS</i> | - | 1.93 | 1.11 | <b>6.10</b> |
| b3371 | <i>frlB</i> | + | 0.59 | 0.67 | <b>1.30</b> |
| b3403 | <i>pck</i>  | - | 2.61 | 1.25 | <b>4.35</b> |
| b3432 | <i>glgB</i> | - | 1.92 | 3.58 | <i>0.51</i> |
| b3433 | <i>asd</i>  | - | 1.47 | 1.84 | <b>0.63</b> |
| b3460 | <i>livJ</i> | + | 0.20 | 0.48 | <b>2.20</b> |

|       |             |   |      |      |             |
|-------|-------------|---|------|------|-------------|
| b3491 | <i>yhiM</i> | + | 0.57 | 0.76 | <b>2.05</b> |
| b3774 | <i>ilvC</i> | + | 0.82 | 0.80 | <b>0.88</b> |
| b3831 | <i>udp</i>  | + | 0.51 | 0.63 | <b>1.47</b> |
| b3870 | <i>glnA</i> | - | 1.71 | 1.33 | <b>1.88</b> |
| b3919 | <i>tpiA</i> | + | 0.83 | 0.76 | <b>0.71</b> |
| b3926 | <i>glpK</i> | + | 0.65 | 0.41 | <i>0.49</i> |
| b3927 | <i>glpF</i> | + | 0.57 | 0.28 | <b>0.44</b> |
| b3981 | <i>secE</i> | - | 1.34 | 1.35 | <b>0.98</b> |
| b3990 | <i>thiH</i> | + | 0.55 | 0.87 | <b>4.30</b> |
| b4034 | <i>malE</i> | + | 0.51 | 0.59 | <b>1.26</b> |
| b4079 | <i>fdhF</i> | + | 0.75 | 0.65 | <b>0.65</b> |
| b4088 | <i>alsB</i> | + | 0.66 | 0.62 | <b>0.86</b> |
| b4120 | <i>melB</i> | + | 0.66 | 0.76 | <b>1.53</b> |
| b4138 | <i>dcuA</i> | - | 1.99 | 4.33 | <i>0.47</i> |
| b4211 | <i>qorB</i> | + | 0.67 | 0.83 | <b>2.17</b> |
| b4216 | <i>ytfJ</i> | + | 0.54 | 0.66 | <b>1.48</b> |
| b4234 | <i>yjgA</i> | + | 0.55 | 0.82 | <b>2.99</b> |
| b4265 | <i>idnT</i> | + | 0.64 | 0.86 | <b>2.96</b> |
| b4266 | <i>idnO</i> | + | 0.67 | 0.46 | <i>0.51</i> |
| b4267 | <i>idnD</i> | + | 0.61 | 0.56 | <b>0.86</b> |
| b4525 | <i>ymjC</i> | + | 0.59 | 0.87 | <b>3.89</b> |

**Table S8.** DNA oligonucleotides used in this study.

| <b>Primer Name</b> | <b>Sequence (5' to 3')</b>                                   |
|--------------------|--------------------------------------------------------------|
| OKT-24             | TGAGGGTGCCTCACCATAAAGATGAGACGCGAAAGACTTGAGCGATTGTGTAGGCT     |
| OKT-25             | GAAGGAAGTTTCTGTTACCCGTGAAGAGATCTACCAGCGTTAATCCATCCAGTCTATTAT |
| OCT-29             | GGAGGTCTGACAGATAGTAG                                         |
| OCT-30             | TCACGGCATTGCGATTAACG                                         |
| OCT-50             | GCGTTAAAGGACACCTCCAGG                                        |
| OCT-51             | GTAATACGACTCACTATAGGTTTCGTTTCGAGCATTCCAG                     |
| OCT-52             | GAGGACGCTAACAGGAACAATG                                       |
| OCT-53             | GTAATACGACTCACTATAGGTTTACAATCCTTGAGGC                        |
| MBO-59             | ACTACCATCGGCGCTACGGC                                         |
| MBO-139            | TTACTTAGGATCCCCGACGTCGCGATTATACCTGAAC                        |
| MBO-140            | CCTGTCCGGTGCCCTCTATGGGTGCTACTTTACGCC                         |
| MBO-197            | TTACTTAGGATCCCCGCGCTATTCTAACGAGAGAAAAGC                      |
| MBO-198            | CCTGTCCGGTGCCCTCGCGTAATTTGATTTCTCACAAG                       |
| MBO-199            | GGGGATCCTAAGTAAGTAAGGAG                                      |
| MBO-200            | AGGGCACCGGACAGGTCG                                           |
| MBO-203            | TTACTTAGGATCCCCCTTAAAGAATAGCCAATGCTCTATTTAAC                 |
| MBO-204            | CCTGTCCGGTGCCCTTCTGTGAGCCTTTACCGTGG                          |
| MBO-207            | TTACTTAGGATCCCCATTCCACTGCTCCTTTATAGGTAC                      |
| MBO-208            | CCTGTCCGGTGCCCTGCAACGCGACGGCGAGAC                            |
